# Supplementary material for: One Step e-Beam Radiation Cross-Linking of Quaternary Hydrogels Dressings Based on Chitosan-Poly(Vinyl-Pyrrolidone)-Poly(Ethylene Glycol)-Poly(Acrylic Acid)
Source: MDPI journal article supplement (doi:10.3390/ijms21239236), 2020-12-03
Supplement: s1 [file s1]

## Supplementary Material

# One step e-beam radiation cross-linking of quaternary hydrogels dressings based on Chitosan-Poly(Vinyl-Pyrrolidone)-Poly(ethylene Glycol)-Poly(Acrylic acid)

Ion Călina <sup>1,2</sup>, Maria Demeter <sup>1,\*</sup>, Anca Scărișoreanu <sup>1</sup>, Veronica Sătulu <sup>1</sup> and Bogdana Mitu <sup>1,\*</sup>

<sup>1</sup> National Institute for Lasers Plasma and Radiation Physics, 409 Atomîștilor, 077125 Măgurele, Romania; calina.cosmin@inflpr.ro (I.C.); anca.scarisoreanu@inflpr.ro (A.S.); veronica.satulu@inflpr.ro (V.S.)

<sup>2</sup> University of Bucharest, Faculty of Physics, 405 Atomîștilor, 077125 Măgurele, Romania

\* Correspondence: maria.dumitrascu@inflpr.ro (M.D.); mitub@infim.ro (B.M.)

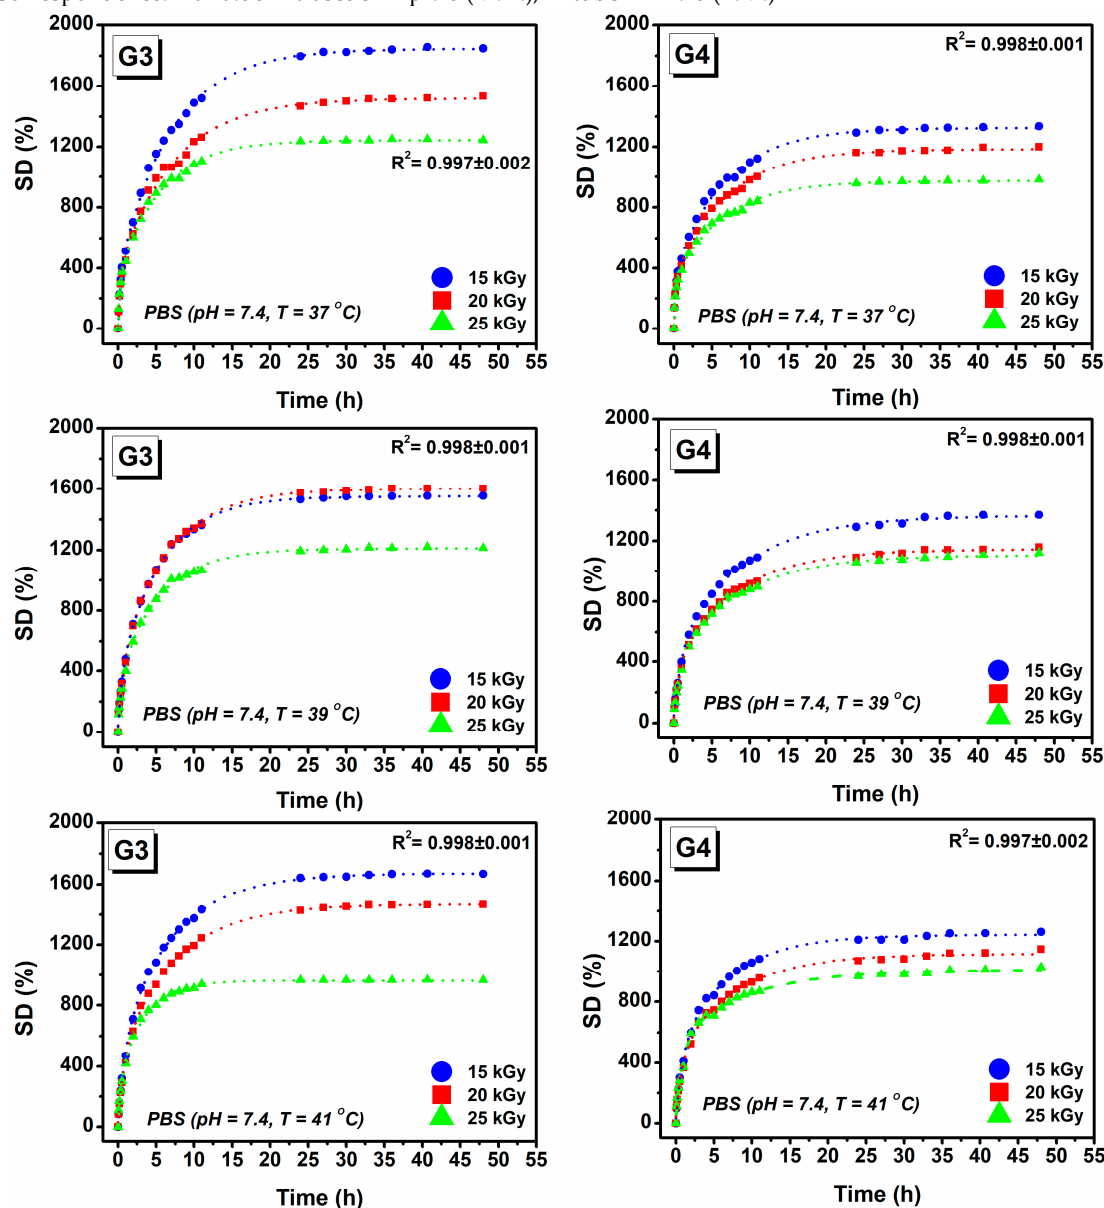

Figure S1. The time evolution of swelling degree of hydrogels in PBS (pH = 7.4) at temperatures in the

range 37–41 °C

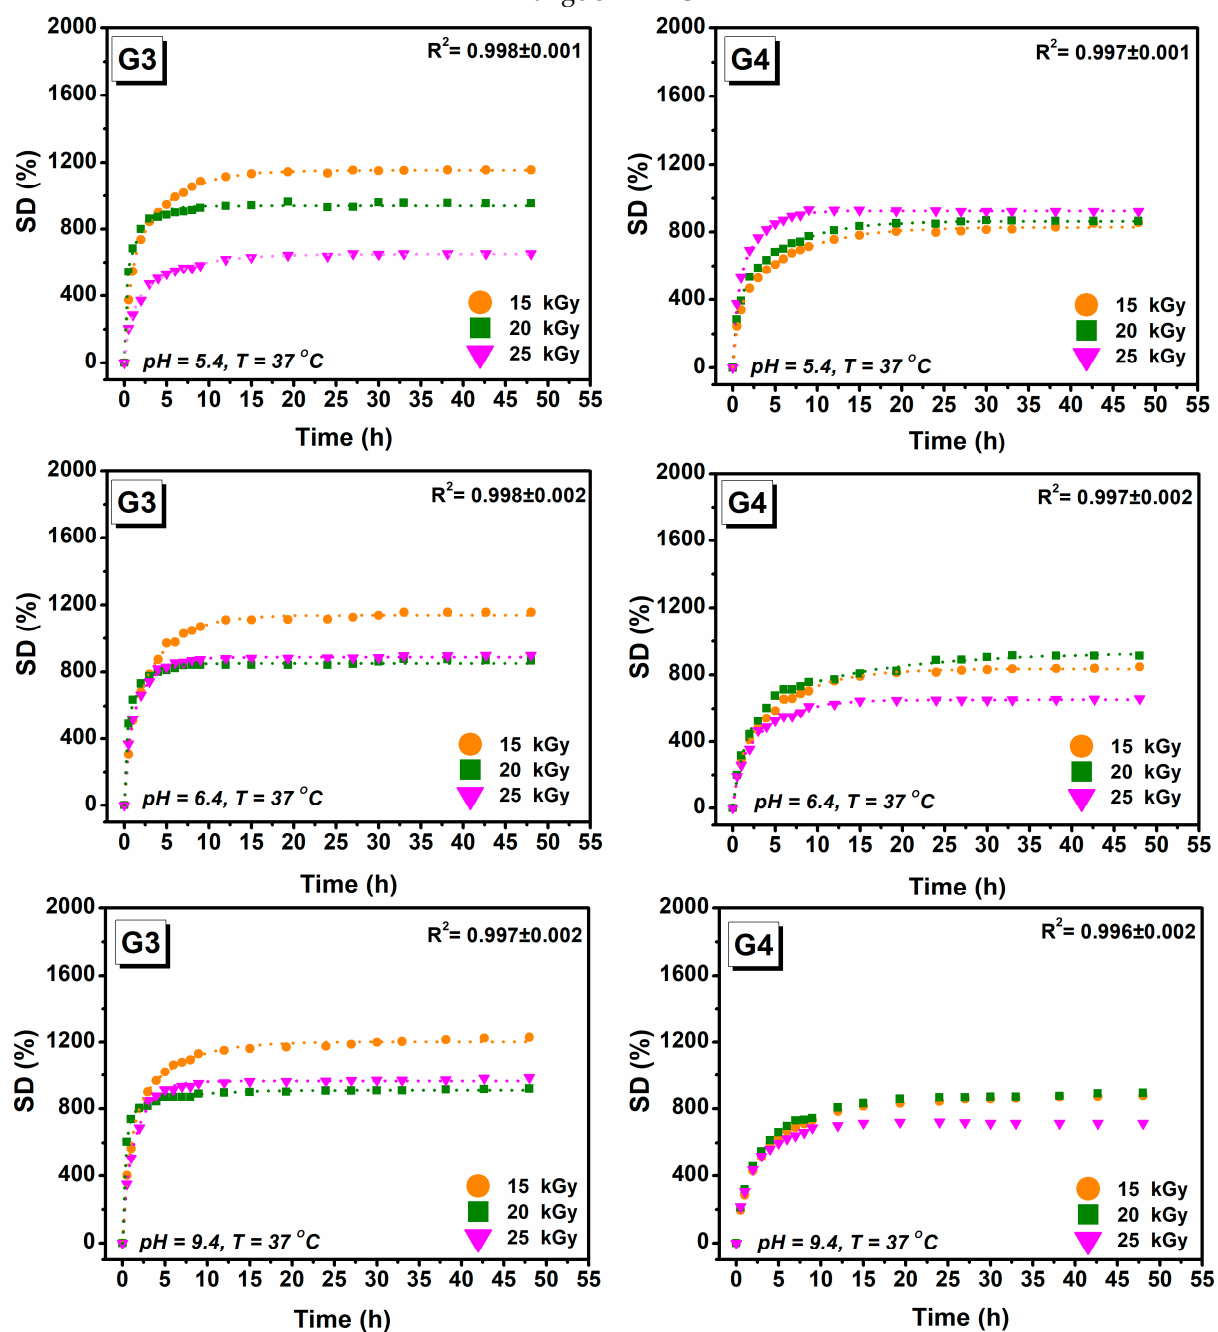

Figure S2. The time evolution of swelling degree of hydrogels in the pH range 5.4–9.4 at 37 °C.

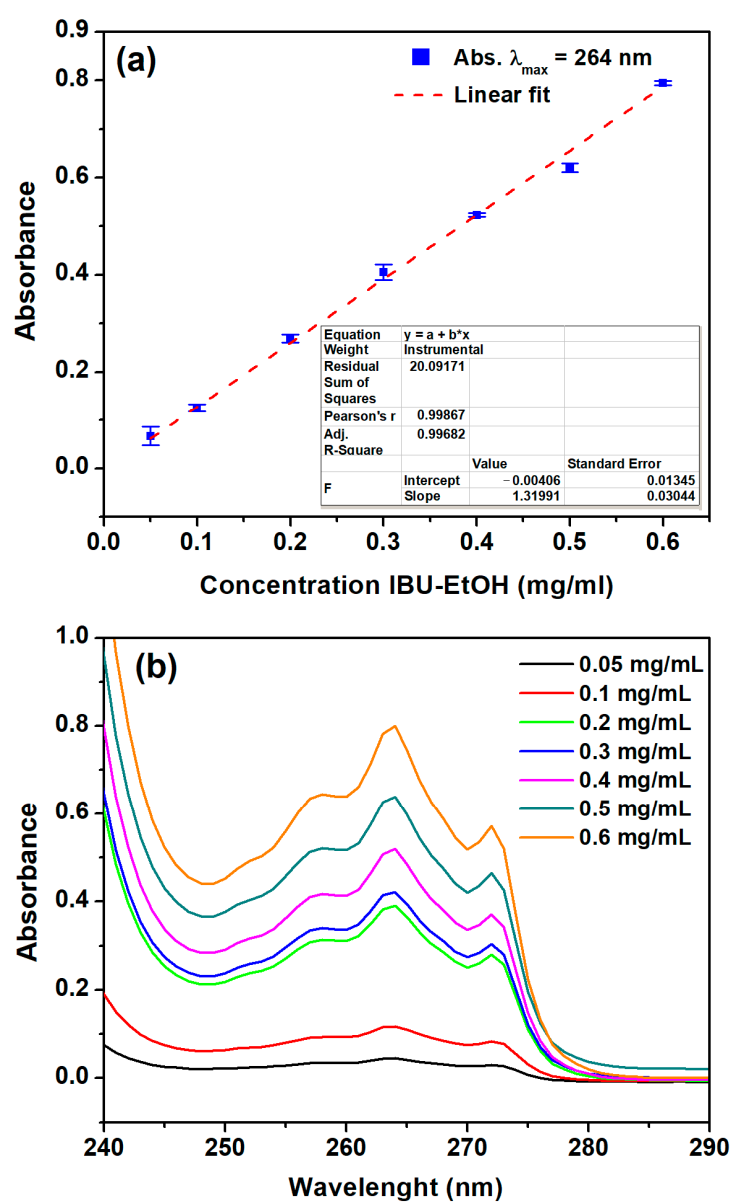

**Figure 3.** (a) Calibration curve of IBU-EtOH (0.05–0.6 mg/mL) at 264 nm; (b) UV-Vis absorption spectra of IBU in EtOH.

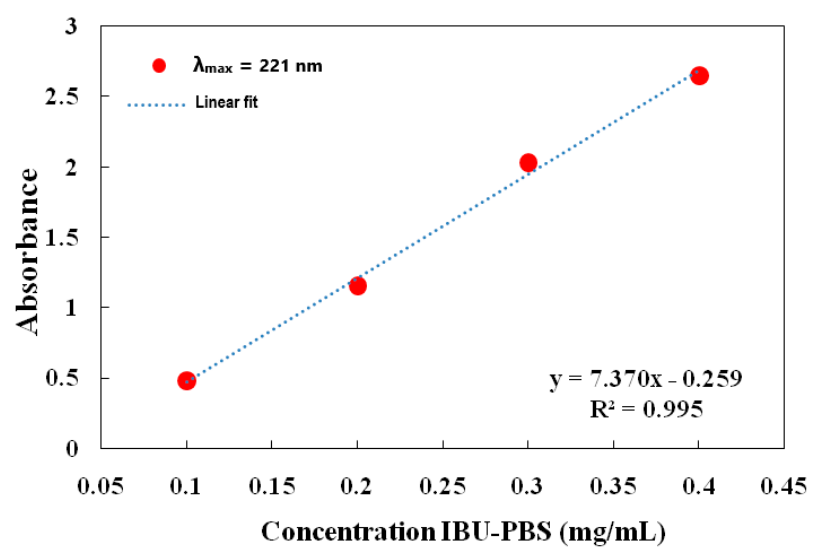

**Figure S4.** Calibration curve of IBU-PBS (0.1–0.4 mg/mL) at 221 nm
